# Supplementary material for: Prevalence and distribution of livestock schistosomiasis and fascioliasis in Côte d’Ivoire: results from a cross-sectional survey
Source: PubMed Central journal article supplement (PMC7672978; doi:10.1186/s12917-020-02667-y), 2020-11-17

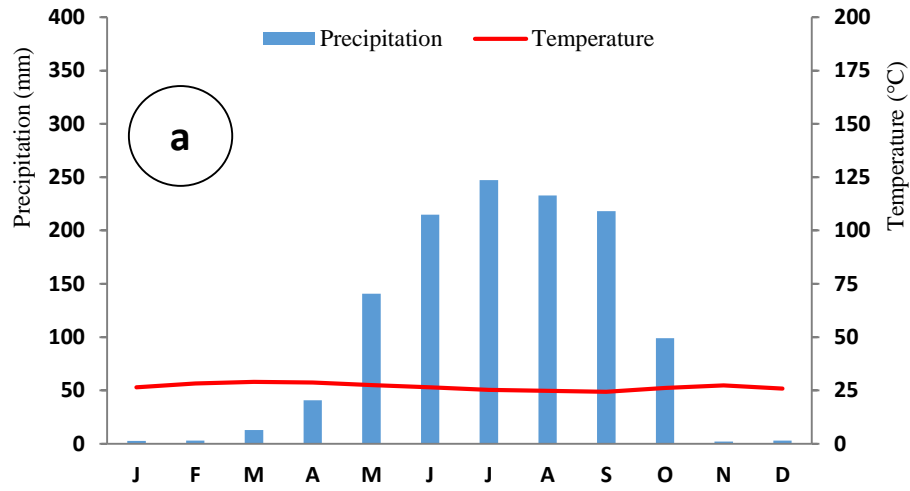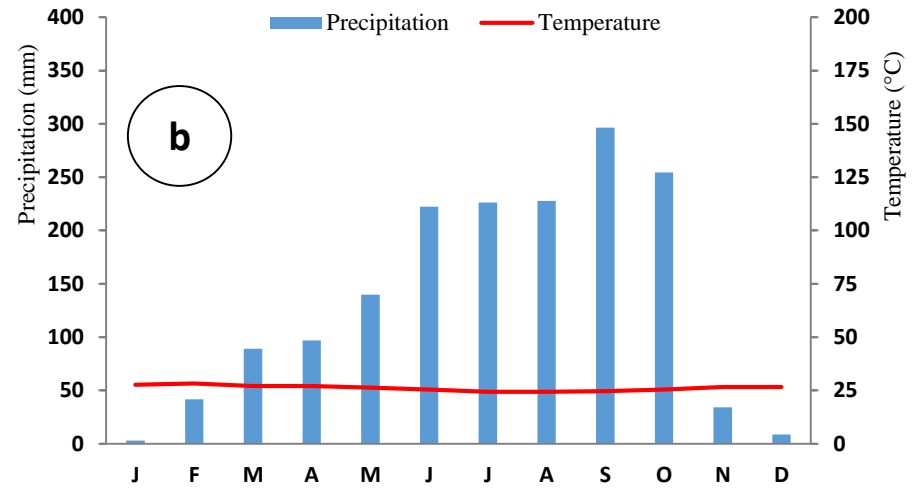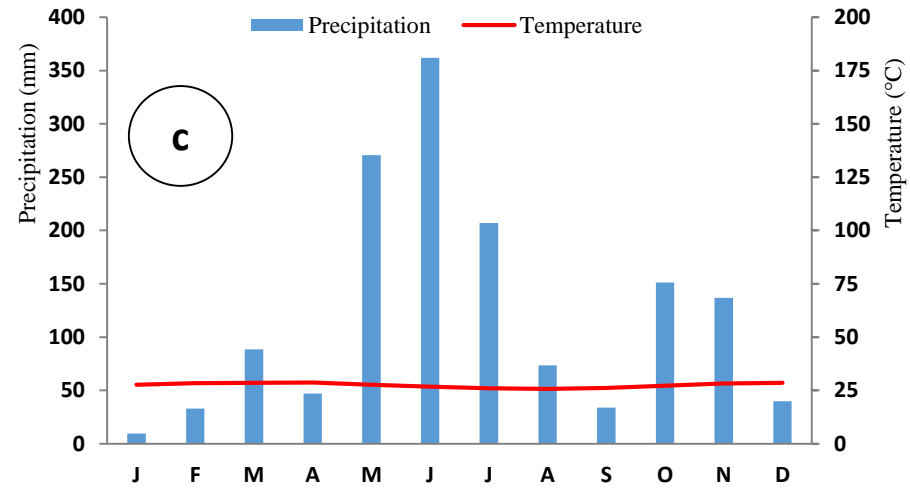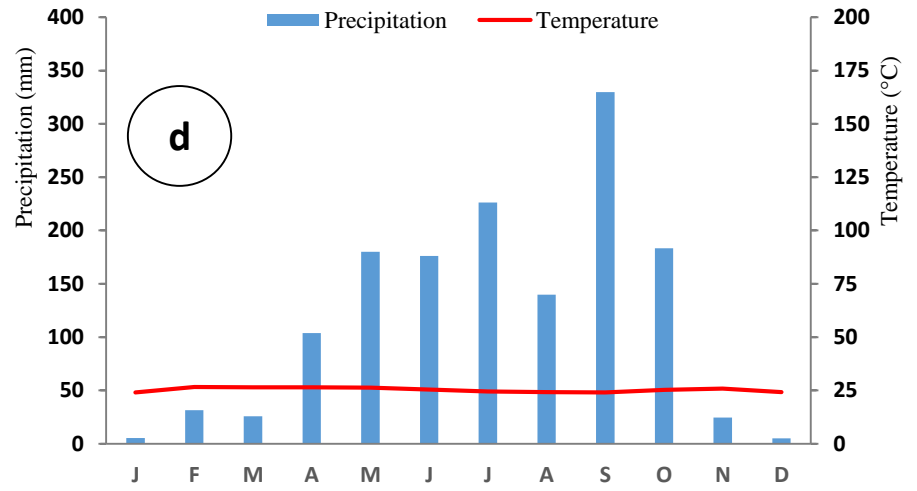

Supplement: 12917_2020_2667_MOESM1_ESM.pdf [file 12917_2020_2667_MOESM1_ESM.pdf]
